# Supplementary material
Source: PubMed Central journal article supplement (PMC7895464)
Supplement: NIHMS1667102-supplement-1.pdf [file NIHMS1667102-supplement-1.pdf]

# Supplementary information:

## The intrinsically disordered N-terminal extension of the ClpS adaptor reprograms its partner AAA+ ClpAP protease

Amaris Torres-Delgado<sup>1</sup>, Hema Chandra Kotamarthi<sup>1</sup>, Robert T. Sauer<sup>1</sup>, Tania A. Baker<sup>1\*</sup>

<sup>1</sup>Department of Biology, Massachusetts Institute of Technology,  
Cambridge, MA, 02139.

\*Correspondence: [tabaker@mit.edu](mailto:tabaker@mit.edu)

Running head: *ClpS reprogramming of ClpAP*

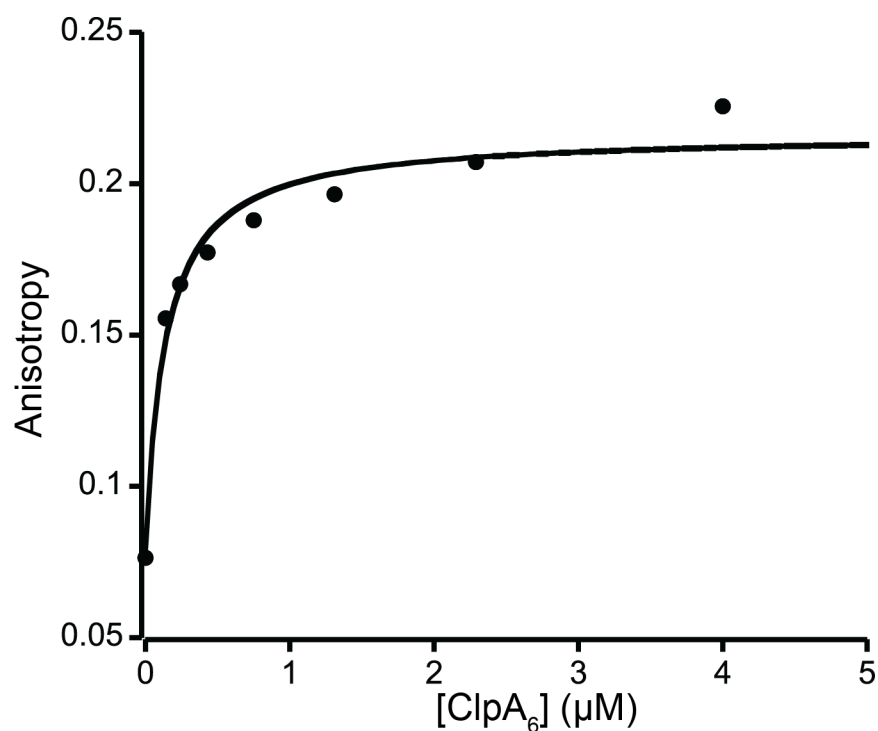

**Supplementary Figure 1: ClpS<sup>ΔN17\*fl</sup> binding to ClpA.** Fluorescence anisotropy of ClpS<sup>ΔN17\*fl</sup> (0.2 μM) in the presence of λ-ssrA (30 μM), 2 mM ATP<sub>γ</sub>S, as assayed at increasing concentrations of ClpA. ClpS<sup>ΔN17\*fl</sup> is a ClpS variant that contains a single cysteine and lacks the N-terminal 17 residues. The line is fit to a quadratic equation for binding with 50% binding ( $K_D$ ) at  $210 \pm 120$  nM. The  $K_D$  is an average  $\pm$  SD (n=3).



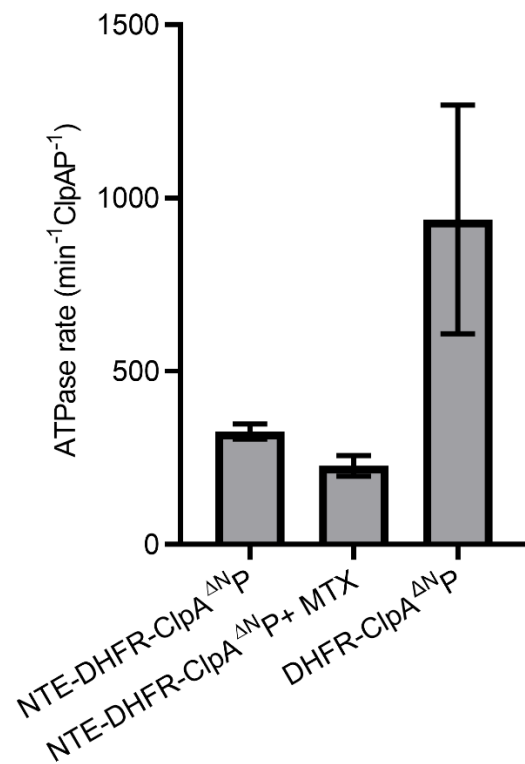

**Supplementary Figure 3: NTE suppresses the ATPase rate of ClpA.** ATP hydrolysis rates of NTE-DHFR-ClpA<sup>ΔN</sup> and DHFR- ClpA<sup>ΔN</sup> chimeras (0.4 μM ClpA<sup>ΔN</sup> chimera, 0.8 μM ClpP<sub>14</sub>) were determined. NTE-DHFR-ClpA<sup>ΔN</sup> has a lower ATPase rate compared to DHFR-ClpA<sup>ΔN</sup>, supporting the model whereby NTE interactions with the translocation machinery suppress the rate of ATP hydrolysis by ClpA. Values are averages ± 1 SD (n = 3).

## Highlights:

- ClpS adaptor enhances and inhibits degradation by ClpAP, tuning substrate choice.
- ClpS impedes degradation of ssrA-substrates, however the mechanism has been unclear.
- In one mechanism, ClpS acts non-competitively to decrease ssrA-tag affinity to ClpA.
- ClpS also reduces the ClpA ATPase, thereby slowing protein unfolding/translocation.
- To inhibit, ClpS's intrinsically disordered "domain" is necessary and sufficient.
- ClpS is multi-faceted, controlling both substrate binding and enzyme activity.
